# Supplementary material
Source: PubMed Central journal article supplement (PMC5487656)
Supplement: AAC.00363-17_zac006176258s1.pdf [file AAC.00363-17_zac006176258s1.pdf]

Supplementary Figure 1. Phylogenetic analysis of GT4 NS3 sequences

Black lettering: Patient sequences from the Elbasvir/Grazoprevir Phase 2/3 development program; Red lettering: North American sequences from external databases; Green lettering: Selected sequences used for Lab evaluation; OT: Other GT4 sequences from external databases

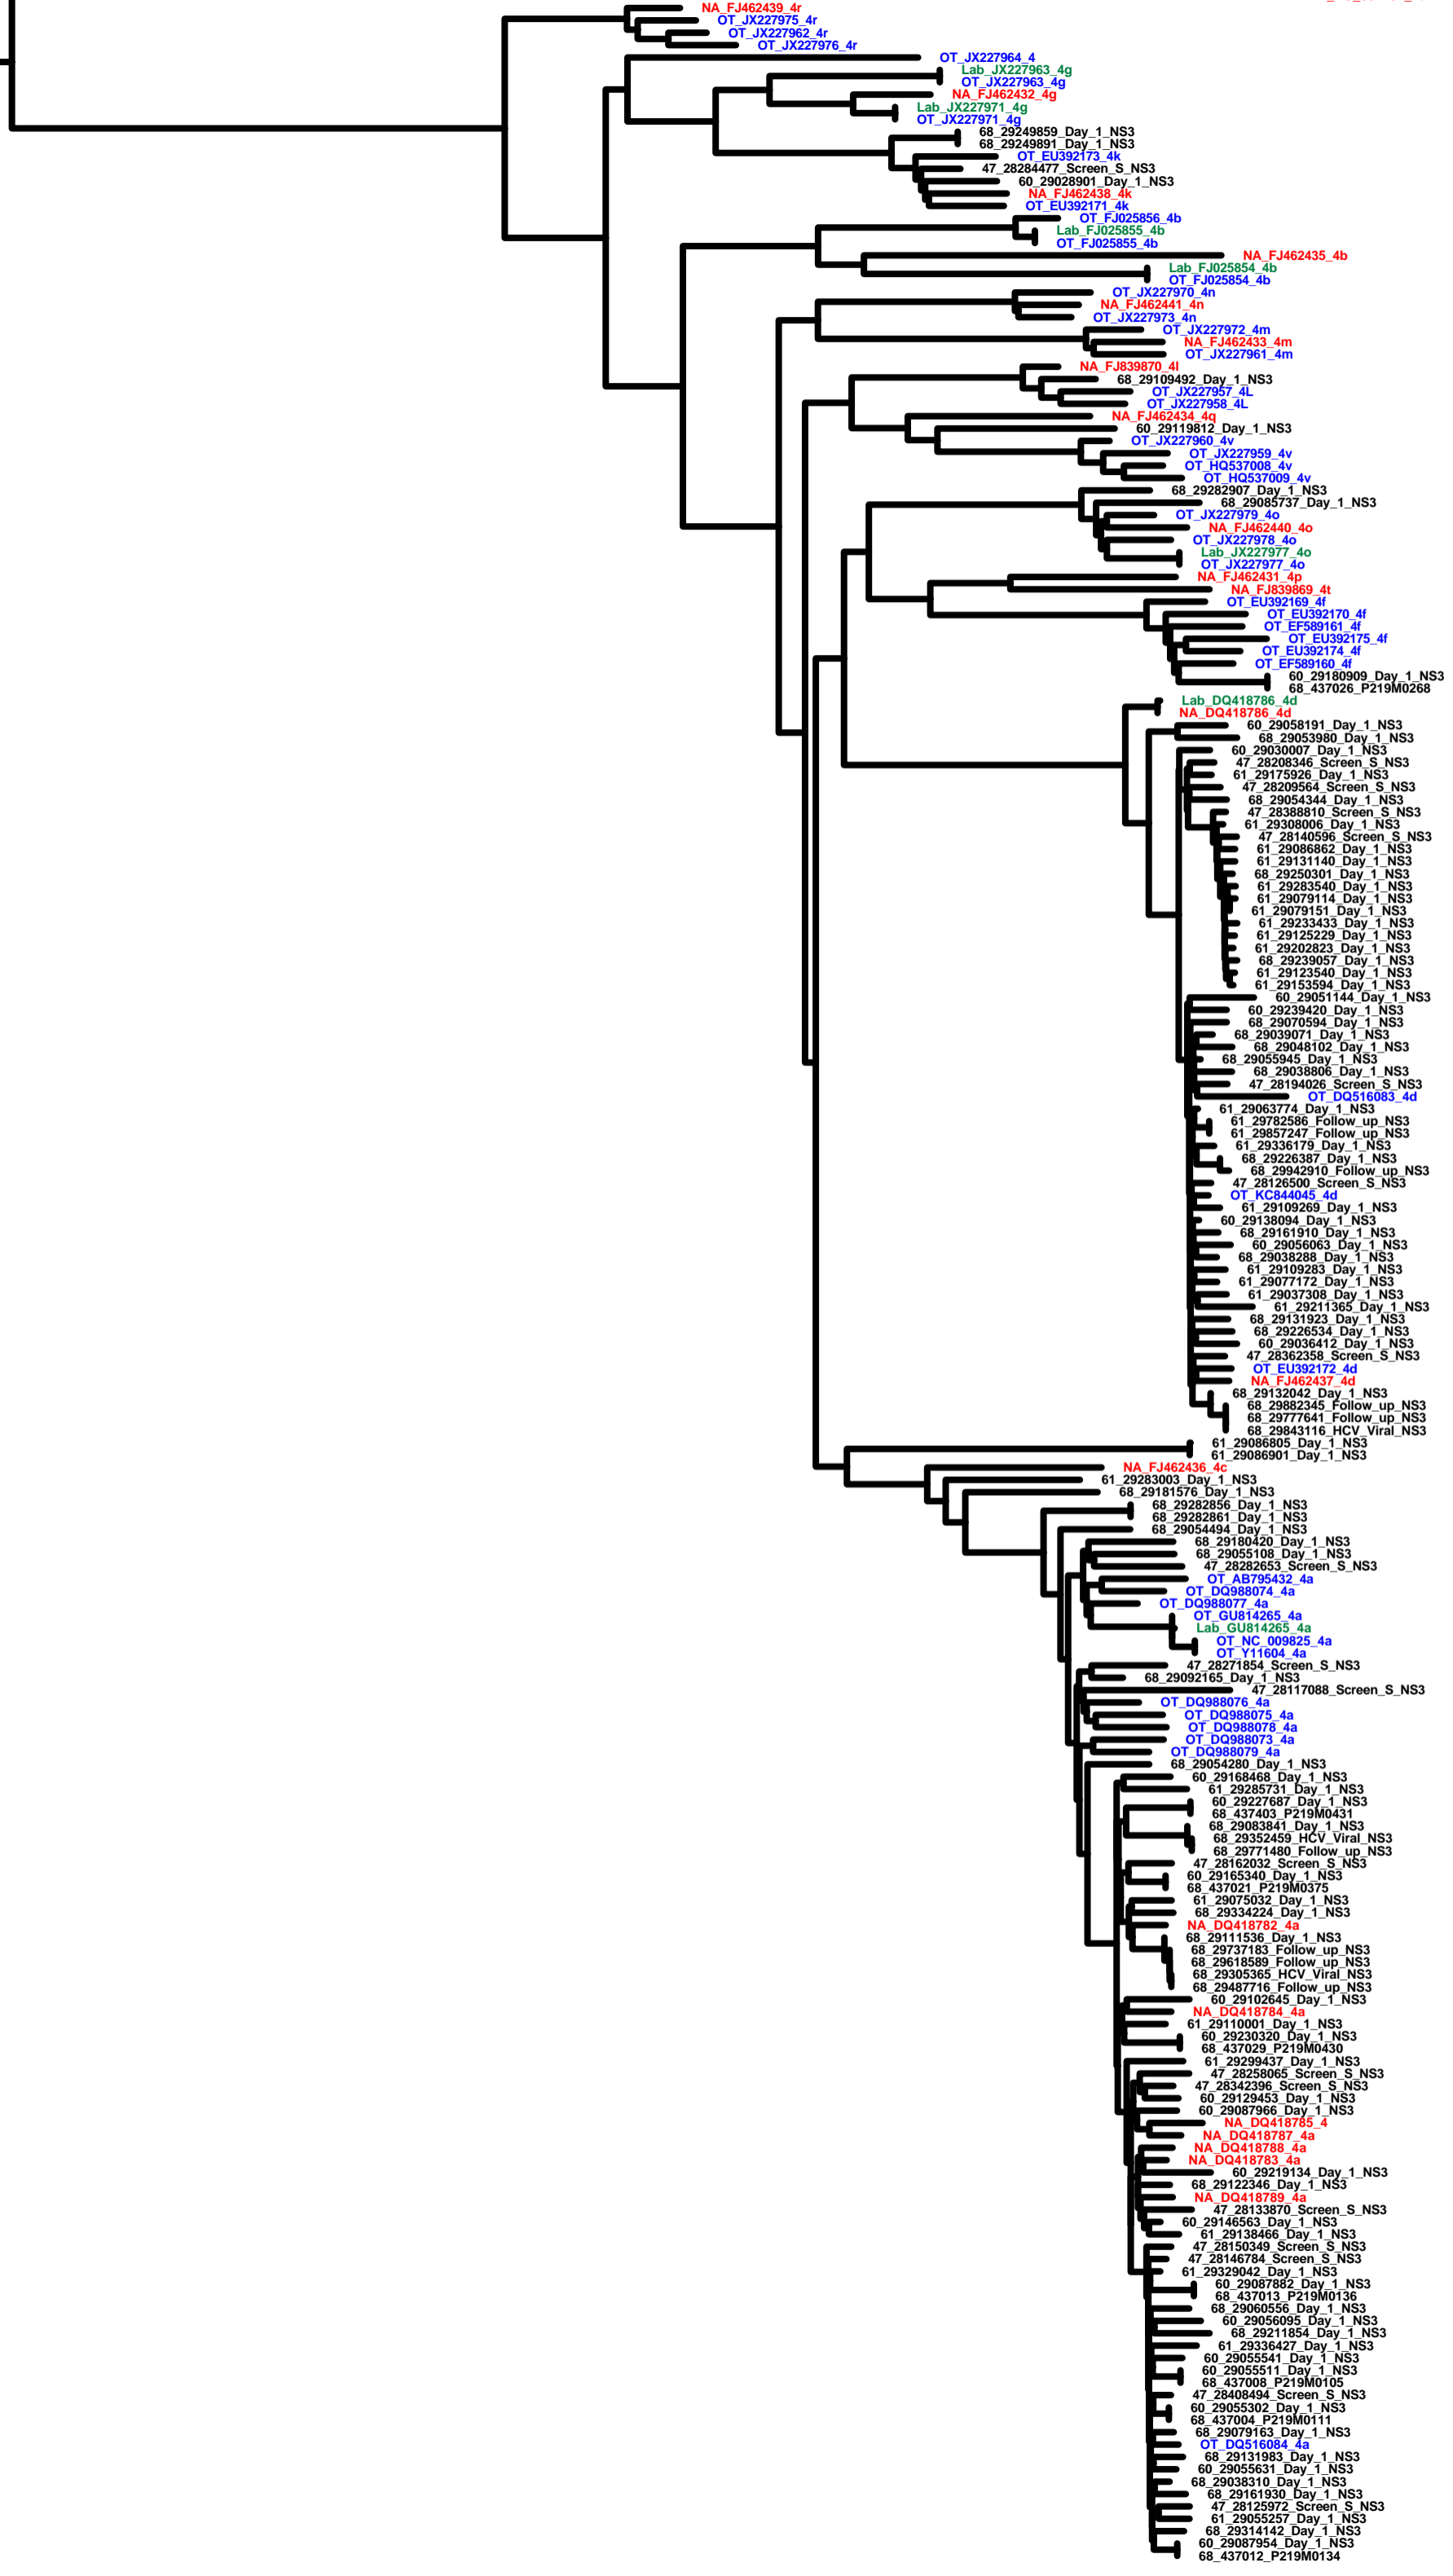

Supplementary Figure 2. Phylogenetic analysis of GT4 NS5A sequences

Black lettering: Patient sequences from the Elbasvir/Grazoprevir Phase 2/3 development program; Red lettering: North American sequences from external databases; Green lettering: Selected sequences used for Lab evaluation; OT: Other GT4 sequences from external databases

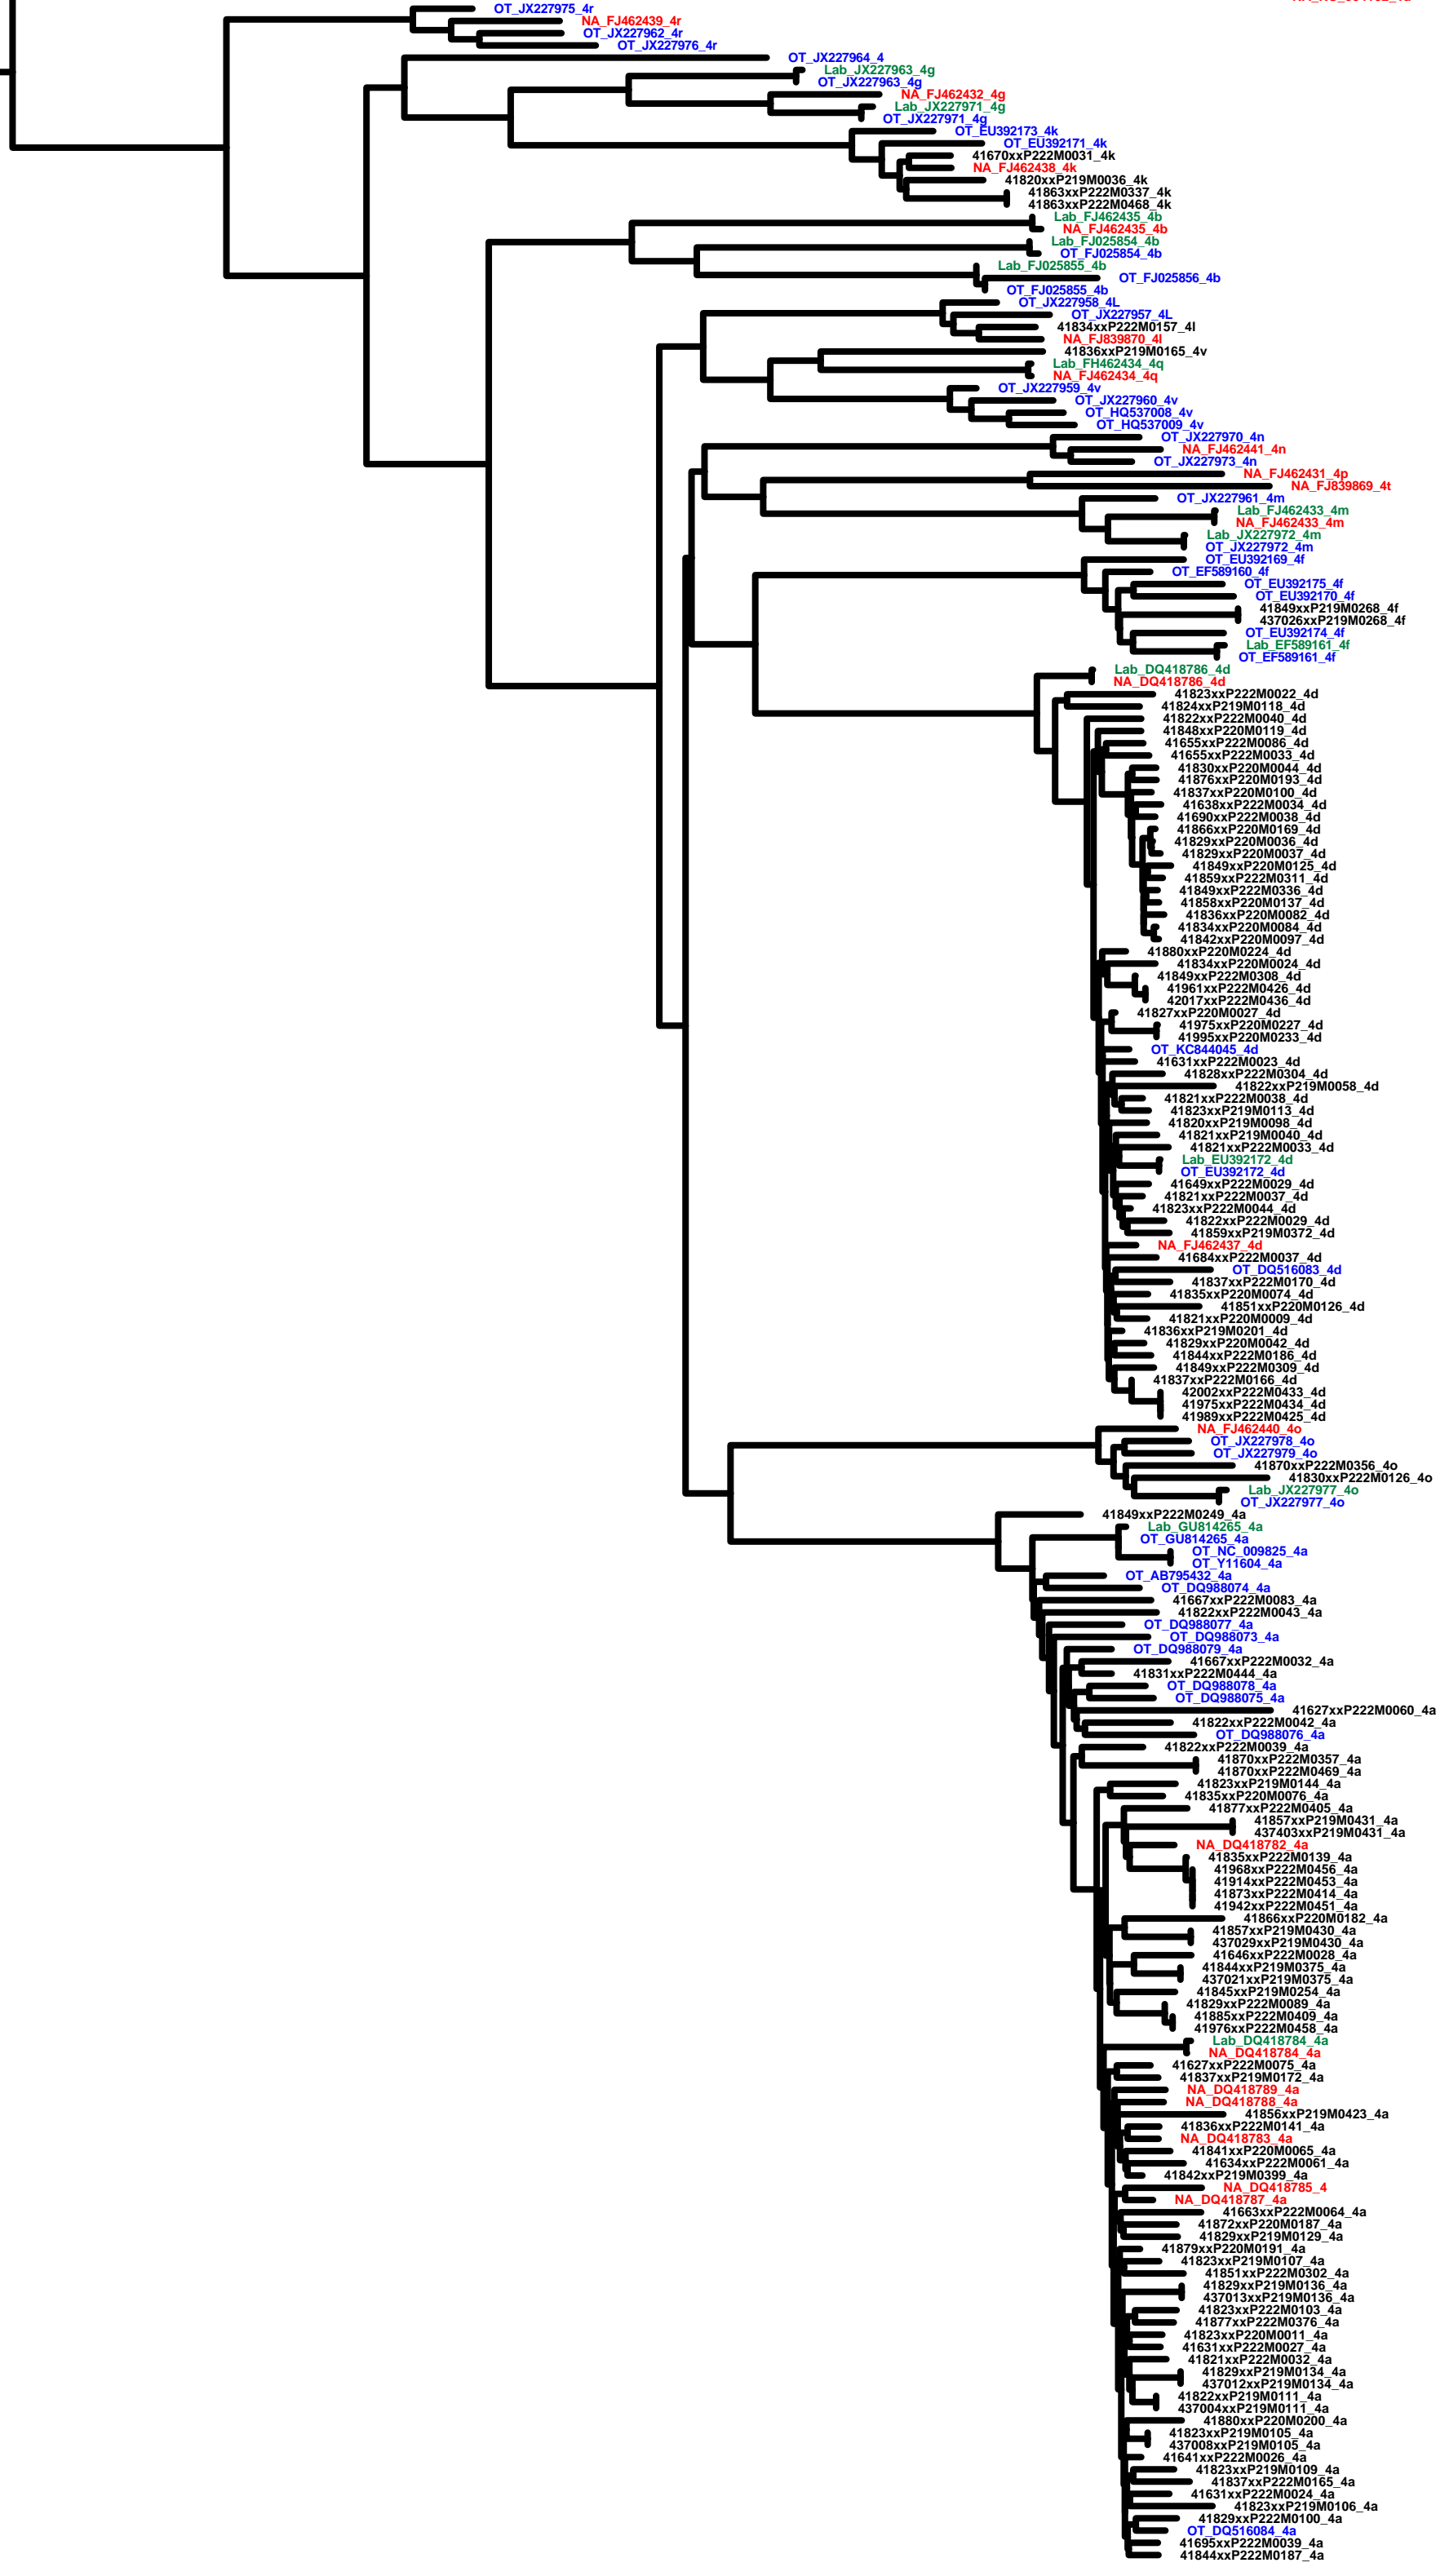

Supplementary Figure 3. An alignment of NS5A subtype sequences

|          |           |       | 1                                    | 50                                            |
|----------|-----------|-------|--------------------------------------|-----------------------------------------------|
| GU814265 | NS5A (4a) | (1)   | AESWLVWVWDVWVCTVLSDFKTWLNKAKLLPLMPGI | PFLSCQRGYKGEWRGD                              |
| DQ418784 | NS5A (4a) | (1)   | ADSWLVWVWDVWVCTVLSDFKTWLNKAKLLPLMPGV | PFLSCQRGYRGEWRGE                              |
| FJ025854 | NS5A (4b) | (1)   | DTSWLREIWDVWVCTVLSDFKTWLNKAKLLPAMPGL | PFLSCQRGYKGEWRGD                              |
| FJ025855 | NS5A (4b) | (1)   | DTNWLREIWDVWVCTVLSDFKSWLNKAKLMPSMPGI | PFLSCQKGYKGVWRGD                              |
| FJ462435 | NS5A (4b) | (1)   | DSSWFREIWDVWVCTVLTDFKNWLNKAKLLPSMPGV | PFISCQRGYKGVWRGD                              |
| DQ418786 | NS5A (4d) | (1)   | DSSWFREIWDVWVCTVLTDFKNWLNKAKLLPSMPGV | PFISCQRGYKGVWRGD                              |
| EU392172 | NS5A (4d) | (1)   | DRSWLWEIWDVWVCTVLSDFKTWLNKAKLLPRMPGV | PFISCQRGYRGVWRGD                              |
| EF589161 | NS5A (4f) | (1)   | DSSWLWEIWDVWVCTVLSDFKTWLNKAKLLQMPGV  | PFISCQKGYKGEWRGD                              |
| JX227963 | NS5A (4g) | (1)   | DSSWLREIWDVWVCTVLTDFKTWLNKAKLLPRMPGL | PFLSCQKGFKEWRGD                               |
| JX227971 | NS5A (4g) | (1)   | DSSWLREIWDVWVCTVLSDFKTWLNKAKLLPLMPGL | PFLSCQKGYRGEWRGD                              |
| FJ462433 | NS5A (4m) | (1)   | DRSWLWEVWDVWVCTVLSDFKTWLNKAKLLPSMPGI | PFLSCQRGYKGEWRGD                              |
| JX227972 | NS5A (4m) | (1)   | DRSWLWEVWDVWVCTVLSDFKTWLNKAKLLPSMPGI | PFISCQKGYKGEWRGD                              |
| JX227977 | NS5A (4o) | (1)   | TLDFWFEIWDVWVCTVLSDFKTWLNKAKLMPTMPGI | PFLSCQKGFKEWRGD                               |
| FJ462434 | NS5A (4q) | (1)   | CTSWLRDIWDVWVCTVLSDFKTWLNKAKLLPRMPGI | PFLSCQKGYRGEWRGE                              |
|          |           |       | 51                                   | 100                                           |
| GU814265 | NS5A (4a) | (51)  | GVMHTT                               | CPCGADLAGHIKNGSMRITGPKTCSNTWHGTFPINAYTTGPGVP  |
| DQ418784 | NS5A (4a) | (51)  | GIMHTK                               | CPCGAELAGHIKNGSMRITGPKTCSNTWHGTFPINAYTTGPGVP  |
| FJ025854 | NS5A (4b) | (51)  | GVMHTK                               | CPCGADIAGHIKNGSMRIVGPRTCNTWHGTFPINATTTGSGVP   |
| FJ025855 | NS5A (4b) | (51)  | CVMHTT                               | CPCGAELAGHIKNGSMRIVGPKTCSNTWHGTFPINASTTGAGVP  |
| FJ462435 | NS5A (4b) | (51)  | GVMHTR                               | CPCGAELAGHIKNGSMRIVGPKTCSNTWHGTFPINTHTTGPVP   |
| DQ418786 | NS5A (4d) | (51)  | GVMHTR                               | CPCGAELAGHIKNGSMRIVGPKTCSNTWHGTFPINTHTTGPVP   |
| EU392172 | NS5A (4d) | (51)  | GVMHTT                               | CPCGAELAGHVKNGSMRIVGPKTCSNTWHGTFPINAYTTGPSVP  |
| EF589161 | NS5A (4f) | (51)  | GVMHTI                               | CPCGAELAGHIKNGSMRIVGPRTCNTWHGTFPINAYTTGPGVP   |
| JX227963 | NS5A (4g) | (51)  | GVMHTT                               | CPCGAQIAGHIKNGSMRIVGPKTCSNTWHGTFPINAYTTGPGVP  |
| JX227971 | NS5A (4g) | (51)  | GVMHTV                               | CPCGASIAGHIKNGSMRIVGPKTCSNTWHGTFPINARTTGPGVP  |
| FJ462433 | NS5A (4m) | (51)  | GVVHTK                               | CPCGARLAGHIKNGSMRIVGPRTCNTWQGTFFPINAYTTGPGVP  |
| JX227972 | NS5A (4m) | (51)  | GVVHTK                               | CPCGARLAGHIKNGSMRIVGPKTCSNTWQGTFFPINAYTTGPGVP |
| JX227977 | NS5A (4o) | (51)  | GVMHTI                               | CPCGANLAGHIKNGSMRIVGPKTCSNTWHGTFPINAYTTGPGVP  |
| FJ462434 | NS5A (4q) | (51)  | GVMHTT                               | CPCGAELAGHIKNGSMRIVGPKTCSNTWHGTFPINAYTTGPGVP  |
|          |           |       | 101                                  | 150                                           |
| GU814265 | NS5A (4a) | (101) | IPAPNYKFALWRVSAEDYVEVRRVGD           | FHYVTGVTQDNIKPCQVPAPEFF                       |
| DQ418784 | NS5A (4a) | (101) | VPAPNYKFALWRVSAEEYVEVRRVGD           | FHYVTGVTQDNIKPCQVPAPEFF                       |
| FJ025854 | NS5A (4b) | (101) | VPAPNYKFALWRVSAEEYVEVRRVGD           | FHYITGMTQDNIKPCQVPAPEFF                       |
| FJ025855 | NS5A (4b) | (101) | IPAPNYKFALWRVSAEEYVEIRRVGE           | FHYVTGMTQDNIKPCQVPAPEFF                       |
| FJ462435 | NS5A (4b) | (101) | IPAPNYKFALWRVSAEDYVEVRRVGD           | FHYITGVTQDNIKPCQVPAPEFF                       |
| DQ418786 | NS5A (4d) | (101) | IPAPNYKFALWRVSAEDYVEVRRVGD           | FHYITGVTQDNIKPCQVPAPEFF                       |
| EU392172 | NS5A (4d) | (101) | IPAPNYKFALWRVSAEEYVEVRRVGE           | FHYITGVTQDNIKPCQVPAPEFF                       |
| EF589161 | NS5A (4f) | (101) | IPAPNYTFALWRVSAEEYVQVRKVG            | DFHYVTGVTQDKIKPCQVPAPEFF                      |
| JX227963 | NS5A (4g) | (101) | VPAPNYKFALWRVSAEEYVEVRRVGD           | YHYVVGVTQDNIKPCQVPAPEFF                       |
| JX227971 | NS5A (4g) | (101) | VPAPNYKFALWRVSAEEYVEVRRVGD           | YHYVVGVTQDNIKPCQVPAPEFF                       |
| FJ462433 | NS5A (4m) | (101) | IPAPNYKFALWRVSAEEYVEVRRVGD           | FHYITGVTQDSIKPCQVPSPEFF                       |
| JX227972 | NS5A (4m) | (101) | IPAPNYKFALWRVSAEEYVEVRRVGD           | FHYITGVTQDTIKPCQVPSPEFF                       |
| JX227977 | NS5A (4o) | (101) | IPAPNYEFALWRVSAEEYVEVRRVGE           | FHYVTGMTQDNIKPCQVPAPEFF                       |
| FJ462434 | NS5A (4q) | (101) | IPAPNYKFALWRVSAEEYVEVRRVGD           | FHYITGVTQDNIKPCQVPAPEFF                       |
|          |           |       | 151                                  | 200                                           |
| GU814265 | NS5A (4a) | (151) | TEVDGIRLHRHAPKCKPLLRDEV              | SFSVGLNSFVVGSQLPCEPEPDVAULT                   |
| DQ418784 | NS5A (4a) | (151) | TEVDGIRLHRHAPKCKPLLRDEV              | TFSVGLNSFVVGSQLPCEPEPDVAULT                   |
| FJ025854 | NS5A (4b) | (151) | TEVDGVRHLHRYAPDCKPLLRDEV             | SFSVGLNTFVVGSQLPCEPEPDVHULT                   |
| FJ025855 | NS5A (4b) | (151) | TEVDGVRHLHRYAPPCKPLLRDEV             | QFTVGLNTFVVGSQLPCEPEPDVQVLT                   |
| FJ462435 | NS5A (4b) | (151) | TEVDGVRHLHRYAPPCKPLLRDEV             | SFSVGLNNSFVVGSQLPCEPEPDVSVLT                  |
| DQ418786 | NS5A (4d) | (151) | TEVDGVRHLHRYAPPCKPLLRDEV             | SFSVGLNNSFVVGSQLPCEPEPDVSVLT                  |
| EU392172 | NS5A (4d) | (151) | TEVDGVRHLHRYAPPCKPLLRDEV             | SFTVGLNNSFVVGSQLPCEPEPDVAVVT                  |

|          |      |      |       |                                                           |
|----------|------|------|-------|-----------------------------------------------------------|
| EF589161 | NS5A | (4f) | (151) | TEVDGVR IHRHAPCKPLLTDEVTF SVGLNSFVVGSQLPCEPEPDVAVLT       |
| JX227963 | NS5A | (4g) | (151) | TEVDG VNLHRYAPPCKPLLRDEVTF SVGLNTFVVGSQLPCEPEPDVAVLT      |
| JX227971 | NS5A | (4g) | (151) | TEVDG VRLHRYAPPCKPLLRDEVTF SVGLNTFVVGSQLPCEPEPDVAVLT      |
| FJ462433 | NS5A | (4m) | (151) | TEVDG VRIHRHAPDCKPLLRDEVTF TVGLNTFVVGSQLPCEPEPDVAVLT      |
| JX227972 | NS5A | (4m) | (151) | TEVDG VRIHRHAPDCKPLLRDEVTF TVGLNSFVVGSQLPCEPEPDVAVLT      |
| JX227977 | NS5A | (4o) | (151) | TEVDG VRLHRHAPKCKPLLRREEVTF SVGLNSFVVGSQLPCEPEPDVVVT      |
| FJ462434 | NS5A | (4q) | (151) | TEVDG VRLHRHAPCKPLLRDEVAFTVGLNSFVVGSQLPCEPEPDVAVLT        |
|          |      |      | 201   | 250                                                       |
| GU814265 | NS5A | (4a) | (201) | SMLTDPSH ITAESARRRLARGSRPSLASSASQLSAPSLKATCTAPHDSP        |
| DQ418784 | NS5A | (4a) | (201) | SMLTDPSH ITAETASRRRLARGSPPSLASSASQLSAPSLKATCTARHGSP       |
| FJ025854 | NS5A | (4b) | (201) | SMLTDPSH LTAETARRRLARGSPPSLASSASQLSAPSLKATCTAHHDSP        |
| FJ025855 | NS5A | (4b) | (201) | SMLTDPSH ITAEAAARRRLARGSPPEASSASQLSAPSLKATCTTNHHSP        |
| FJ462435 | NS5A | (4b) | (201) | SMLTDPSH VTAEQAARRLGRGSPPSLASSASQLSAPSLKATCTAHHDSP        |
| DQ418786 | NS5A | (4d) | (201) | SMLTDPSH VTAEQAARRLGRGSPPSLASSASQLSAPSLKATCTAHHDSP        |
| EU392172 | NS5A | (4d) | (201) | SMLTDPSH ITAEAAARRRLARGSPPSLASSASQLSAPSLKATCTDHKDSP       |
| EF589161 | NS5A | (4f) | (201) | SMLTDPSH ITAEAAARRRLARGSPPSLASSASQLSAPSLKATCTAHHSSP       |
| JX227963 | NS5A | (4g) | (201) | SMLTDPSH ITAESARRRLARGSPPSLASSASQLSAPSLKATCTTNHHSP        |
| JX227971 | NS5A | (4g) | (201) | SMLTDPSH ITAESARRRLARGSPPSLASSASQLSAPSLKATCTAHHDSP        |
| FJ462433 | NS5A | (4m) | (201) | SMLTDPSHMTAETARRRLARGSPPSLASSASQLSAPSLKATCPADH DSP        |
| JX227972 | NS5A | (4m) | (201) | SMLTDPSH ITAETARRRLARGSPPSLASSASQLSAPSLKATCPADH DSP       |
| JX227977 | NS5A | (4o) | (201) | SMLTDPSH VTAEAAARRRLARGSPPSLASSASQLSAPSLKATCAAHD -TP      |
| FJ462434 | NS5A | (4q) | (201) | SMXTDPSH ITAEAAARRRLARGSPPSLASSASQLSAPSLKATCTQH DSP       |
|          |      |      | 251   | 300                                                       |
| GU814265 | NS5A | (4a) | (251) | GTDLLEANLLW----GSTA TRVETDEKVIILDSFESCVAEPNDDREVSVA       |
| DQ418784 | NS5A | (4a) | (251) | GTDLLEANLLW----GSAATR VETDERVIILDSFEP CVAESDDKKEVSVA      |
| FJ025854 | NS5A | (4b) | (251) | DADLLEANLLWRQEMG SNI TRVESENKVVVLD SFEP LVAEP-DDVEI STA   |
| FJ025855 | NS5A | (4b) | (251) | DADLLEANLLWRQEMG GN I TRVESENKVVVLD SFEP LVAEX-DSGEV SV P |
| FJ462435 | NS5A | (4b) | (251) | DADLLEANLLWRQEMG GD I TRVESKNKVVILDSF DPLVAEE-EDGEI SV P  |
| DQ418786 | NS5A | (4d) | (251) | DADLLEANLLWRQEMG GD I TRVESKNKVVILDSF DPLVAEE-EDGEI SV P  |
| EU392172 | NS5A | (4d) | (251) | GVDLLEANLLW----GANATR VESDKVLIILDSFEP LVAET-DDREV SV P    |
| EF589161 | NS5A | (4f) | (251) | GQDLLEANLLW----GTSATR VELGDKVMVLD SFEP LVAE--EDKEV SV E   |
| JX227963 | NS5A | (4g) | (251) | DADLLEANLLWRQEMG SNI TRVESESKVVILDSF DPLVAET-DDREV SV A   |
| JX227971 | NS5A | (4g) | (251) | DADLLEANLLWRQEMG NN I TRVESENKVVILDSF EP LVAET-DDKEV SV A |
| FJ462433 | NS5A | (4m) | (251) | GADLLEANLLW----GAGATR VETDSKVVVLD SFEP LRAET-DDREI SV A   |
| JX227972 | NS5A | (4m) | (251) | GTDLLEANLLW----GASATR VETDAKVVVLD SFEP LRAEP-DDREI SV A   |
| JX227977 | NS5A | (4o) | (250) | GSDLLEANLLW----GSNVTR IESETKVVTLDSF EP IVAES-DDREV SV A   |
| FJ462434 | NS5A | (4q) | (251) | GTDLLEANLLW----GAGVTR IESEDKVMVLD SFEP ITAEQ-EDREV SV A   |
|          |      |      | 301   | 350                                                       |
| GU814265 | NS5A | (4a) | (297) | AEILRP-TKKFPPALPIWARPDYNPPLTETWKQ QDYKPPTVHGCALPPGK       |
| DQ418784 | NS5A | (4a) | (297) | AEILRP-TKKFPPALPIWARPDYNPPLTETWKQ RDYCPPTVYGCALPPSK       |
| FJ025854 | NS5A | (4b) | (300) | AEVMRR-VKKFPPALPIWARPDYNPPLLEPWKQ PDYIPPVVHGCALPPNK       |
| FJ025855 | NS5A | (4b) | (300) | AEILRR-SKRFPPKLPPIWARPDYNPPLIEPWKQ PDYTPPVVHGCALPPSK      |
| FJ462435 | NS5A | (4b) | (300) | AEILRR-TKRFPPAIPVWARPDYNPPLLETWKR PDYIPPVVHGCALPPSK       |
| DQ418786 | NS5A | (4d) | (300) | AEILRR-TKRFPPAIPVWARPDYNPPLLETWKR PDYIPPVVHGCALPPSK       |
| EU392172 | NS5A | (4d) | (296) | AEILRT-SKKFPRAMP IWAQPAYNPPLIETWKQ PDYEP PVVHGCALPPDK     |
| EF589161 | NS5A | (4f) | (295) | AEILRPGK KKFPPAIPWARPDYNPPLVESWKQ PDYEP PVVHGCALPPSN      |
| JX227963 | NS5A | (4g) | (300) | AEALRK-TKKFPQAI PVWARPDYNPPLIETWKK PDYDPPAVHGCALPPGG      |
| JX227971 | NS5A | (4g) | (300) | AEILRK-TRKFPRAMPVWARPDYNPPLLEKWK EPDYDPPVHGCALPAGG        |
| FJ462433 | NS5A | (4m) | (296) | AEVLC P-SKRFPPALPIWARPDYNPPLVEAWKR PDYDPPVHGCALPSSR       |
| JX227972 | NS5A | (4m) | (296) | AEVLRP-SKRFPPALPIWARPDYNPPLVEPWKQ PDYDPPVHGCALPSSK        |
| JX227977 | NS5A | (4o) | (295) | AEILRT-SKKFPAAIPVWARPEYNPPLVDTWKR PDYQPPVHGCALPSSK        |
| FJ462434 | NS5A | (4q) | (296) | AEILRPSR KKFPPAIPVWARADYNPPLVEVWKQ PGYDPPVHGCALPPSG       |
|          |      |      | 351   | 400                                                       |
| GU814265 | NS5A | (4a) | (346) | QPPVPPRR-KRTVQLTESV VSTALAE LAAKTFGQSEPS SDRD TDLTTPT     |
| DQ418784 | NS5A | (4a) | (346) | QPPVPPRR-KRTVQLTESV ASALAE LAAKTFGQPELGS DSGADLTTPT       |
| FJ025854 | NS5A | (4b) | (349) | PAPVPPRR-KRVVALSESNVSSALAM LAAKTFGQPD-DADSGTGLTSPT        |
| FJ025855 | NS5A | (4b) | (349) | PTPVPPRR-KRAIVLTESNVSSALADLA AKVLSQPDADVDSGTGLTLPS        |

|          |      |      |       |                                                       |
|----------|------|------|-------|-------------------------------------------------------|
| FJ462435 | NS5A | (4b) | (349) | PTPVPPSRR-KRMVALTESNVSEALAE LAIKSFGQPAADADSGTGFTSPT   |
| DQ418786 | NS5A | (4d) | (349) | PTPVPPSRR-KRMVALTESNVSEALAE LAIKSFGQPAADADSGTGFTSPT   |
| EU392172 | NS5A | (4d) | (345) | PTPVPPRR-KRAVALSESNISAALASLADKTFGQPVVSSDSGAAISTPT     |
| EF589161 | NS5A | (4f) | (345) | QPPVPPRRRKKTVVLSESTVSDALADLAAKSFGRPESEPD SGAGFTTPT    |
| JX227963 | NS5A | (4g) | (349) | LPVPPRR-KRTVVLTESSVSGALAE LAKKTFSPSTQD TDSGAGLTSPT    |
| JX227971 | NS5A | (4g) | (349) | LPVPPRR-KRAVVLTESNVSEALAE LATKSFSSSTQD TDSGAALTSPT    |
| FJ462433 | NS5A | (4m) | (345) | PTPVPPRR-KRAVVLSESVISSALADLAAKSFSGAESDSGAGLTSPT       |
| JX227972 | NS5A | (4m) | (345) | TTPVPPRR-KRAVVLSESVISSALADLAAKSFSGQSGVESDSGAGLSSPT    |
| JX227977 | NS5A | (4o) | (344) | PAPVPPRR-KRTVVLDESTVSNVLAGLAEKTFGRPEPDFDSE GASITTT    |
| FJ462434 | NS5A | (4q) | (346) | TTPVPPRR-KRTVVLTESKVAEALSDLAAKTFSESSHD SGAGLTTSS      |
|          |      |      | 401   | 450                                                   |
| GU814265 | NS5A | (4a) | (395) | ETTDSGPIVDDASDDGSYSSMPLEGE PGDPDLTSDSWSTVS --- GSED   |
| DQ418784 | NS5A | (4a) | (395) | ETTHSGPILADDASDNGSYSSMPLEGE PGDPDLTSDSWSTVS --- GSED  |
| FJ025854 | NS5A | (4b) | (397) | ETTNPDP SIADDRSDDGSFSSMPLEGE PGDPDLTSDSWSTVS --- GSDD |
| FJ025855 | NS5A | (4b) | (398) | ETSTPDPPIADDRSDDGSFSSMPLEGE PGDPDLTSDSWSTVS --- GSED  |
| FJ462435 | NS5A | (4b) | (398) | DTSTPDSPADDDKSDDGSFSSMPLEGE PGDPDLTSDSWSTVS --- GSED  |
| DQ418786 | NS5A | (4d) | (398) | DTSTPDSPADDDKSDDGSFSSMPLEGE PGDPDLTSDSWSTVS --- GSED  |
| EU392172 | NS5A | (4d) | (394) | ETSEPDPIIADDKSDESYSMPLEGE PGDPDLTSDSWSTVS --- GSED    |
| EF589161 | NS5A | (4f) | (395) | GTSDSGPIVDDASDDGSYSSMPLEGE PGDPDLTSDSWSTVS --- GSED   |
| JX227963 | NS5A | (4g) | (398) | ETSEPDPEADSQDDGSYSSMPLEGE PGDPDLTSDSWSTVS --- GSED    |
| JX227971 | NS5A | (4g) | (398) | DTSKPDSSEADDQDDGSYSSMPLEGE PGDPDLTSDSWSTVS --- SSED   |
| FJ462433 | NS5A | (4m) | (394) | EPSEPDPIVDDRSDDESYSMPLEGE PGDPDLGSDSWSTVS --- GSED    |
| JX227972 | NS5A | (4m) | (394) | EPSEPDPIVDDRSDDESYSMPLEGE PGDPDLGSDSWSTVS --- GSED    |
| JX227977 | NS5A | (4o) | (393) | ETPDGPIVDDQDDGSYSSMPLEGE PGDPDLTSDSWSTVS --- ESED     |
| FJ462434 | NS5A | (4q) | (395) | ETSRPDPPIVDDASDDGSYSSMPLEGE PGDPDLTSDSWSTVSSSQGTED    |
|          |      |      | 451   |                                                       |
| GU814265 | NS5A | (4a) | (442) | VVCC                                                  |
| DQ418784 | NS5A | (4a) | (442) | VVCC                                                  |
| FJ025854 | NS5A | (4b) | (444) | VVCC                                                  |
| FJ025855 | NS5A | (4b) | (445) | VVCC                                                  |
| FJ462435 | NS5A | (4b) | (445) | VVCC                                                  |
| DQ418786 | NS5A | (4d) | (445) | VVCC                                                  |
| EU392172 | NS5A | (4d) | (441) | VVCC                                                  |
| EF589161 | NS5A | (4f) | (442) | VVCC                                                  |
| JX227963 | NS5A | (4g) | (445) | V---                                                  |
| JX227971 | NS5A | (4g) | (445) | V---                                                  |
| FJ462433 | NS5A | (4m) | (441) | VVCC                                                  |
| JX227972 | NS5A | (4m) | (441) | VVCC                                                  |
| JX227977 | NS5A | (4o) | (440) | VVCC                                                  |
| FJ462434 | NS5A | (4q) | (445) | V---                                                  |
